# Supplementary material for: The role of hydroxyethyl groups in the construction of wormlike micelles in the system of quaternary ammonium surfactant and sodium salicylate
Source: Royal Society of Chemistry journal article supplement (doi:10.1039/c5sm01698c), 2015-01-01
Supplement: c5sm01698c1.pdf [file c5sm01698c1.pdf]

*Supporting Information*

**The Role of Hydroxyethyl in the Construction of Wormlike  
Micelles in the System of Quaternary Ammonium  
Surfactant and Sodium Salicylate**

Caili Dai,<sup>a</sup> Xuepeng Wu,<sup>a</sup> Weitao Li,<sup>a</sup> Qin You,<sup>b</sup> Mingwei Zhao,<sup>a\*</sup>

Mingyong Du,<sup>a</sup> Yifei Liu,<sup>a</sup> Yuyang Li<sup>a</sup>

*<sup>a</sup> School of Petroleum Engineering, State Key Laboratory of Heavy Oil Processing,  
China University of Petroleum (East China), Qingdao, Shandong, 266580, People's*

*Republic of China*

*<sup>b</sup> School of Energy Resources, China University of Geosciences, Beijing 100083,*

*People's Republic of China*

---

\* Mingwei Zhao Email: zhaomingwei@upc.edu.cn

Tel: +86-532-86981183 Fax: +86-532-86981161

Table S1 Selected of bond lengths (Å) and angles (°) for complex 5

| <b>Bonds</b> | <b>Dist.[Å]</b> | <b>Angles</b>     | <b>[°]</b> |
|--------------|-----------------|-------------------|------------|
| N(1)-C(17)   | 1.494(9)        | C(17)-N(1)-C(16)  | 110.6(5)   |
| N(1)-C(16)   | 1.520(7)        | C(17)-N(1)-C(20)  | 107.2(5)   |
| N(1)-C(20)   | 1.524(8)        | C(16)-N(1)-C(20)  | 111.3(5)   |
| N(1)-C(18)   | 1.528(6)        | C(17)-N(1)-C(18)  | 110.8(5)   |
| O(2)-C(21)   | 1.400(9)        | C(16)-N(1)-C(18)  | 105.6(4)   |
| O(1)-C(19)   | 1.410(7)        | C(20)-N(1)-C(18)  | 111.4(5)   |
| C(18)-C(19)  | 1.510(8)        | C(19)-C(18)-N(1)  | 116.1(5)   |
| C(21)-C(20)  | 1.531(11)       | O(1)-C(19)-C(18)  | 109.0(5)   |
| C(16)-C(15)  | 1.518(7)        | O(2)-C(21)-C(20)  | 114.7(6)   |
| C(14)-C(13)  | 1.509(8)        | C(15)-C(16)-N(1)  | 116.0(5)   |
| C(14)-C(15)  | 1.523(9)        | C(13)-C(14)-C(15) | 114.1(6)   |
| C(12)-C(13)  | 1.507(9)        | N(1)-C(20)-C(21)  | 116.8(5)   |
| C(12)-C(11)  | 1.507(8)        | C(13)-C(12)-C(11) | 115.2(6)   |
| C(6)-C(5)    | 1.493(9)        | C(16)-C(15)-C(14) | 109.3(6)   |
| C(6)-C(7)    | 1.498(9)        | C(5)-C(6)-C(7)    | 116.7(7)   |
| C(7)-C(8)    | 1.483(9)        | C(8)-C(7)-C(6)    | 117.3(7)   |
| C(9)-C(8)    | 1.494(9)        | C(8)-C(9)-C(10)   | 116.8(7)   |
| C(9)-C(10)   | 1.498(8)        | C(11)-C(10)-C(9)  | 116.3(6)   |
| C(10)-C(11)  | 1.495(9)        | C(7)-C(8)-C(9)    | 117.5(7)   |
| C(5)-C(4)    | 1.492(10)       | C(4)-C(5)-C(6)    | 117.0(7)   |
| C(4)-C(3)    | 1.487(9)        | C(3)-C(4)-C(5)    | 117.2(7)   |
| C(3)-C(2)    | 1.481(10)       | C(10)-C(11)-C(12) | 115.8(6)   |
| C(2)-C(1)    | 1.485(11)       | C(12)-C(13)-C(14) | 114.7(6)   |
|              |                 | C(2)-C(3)-C(4)    | 117.4(8)   |
|              |                 | C(3)-C(2)-C(1)    | 117.7(8)   |

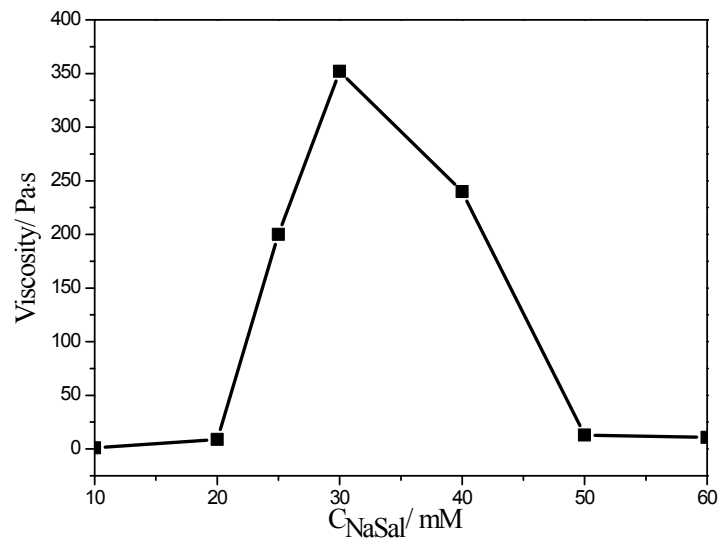

Fig. S1 Variation zero-shear viscosity ( $\eta_0$ ) as a function of different concentration of NaSal for the 50 mM CDHAB at 25 °C .
